# Supplementary material for: Development of an in vitro carcinogenesis model of human papillomavirus‐induced cervical adenocarcinoma
Source: PubMed Central journal article supplement — Cancer Sci. 2021 Dec 30;113(3):904–15. doi: 10.1111/cas.15246 (PMC8898731; doi:10.1111/cas.15246), 2021-12-30
Supplement: CAS-113-904-s003.pdf [file CAS-113-904-s003.pdf]

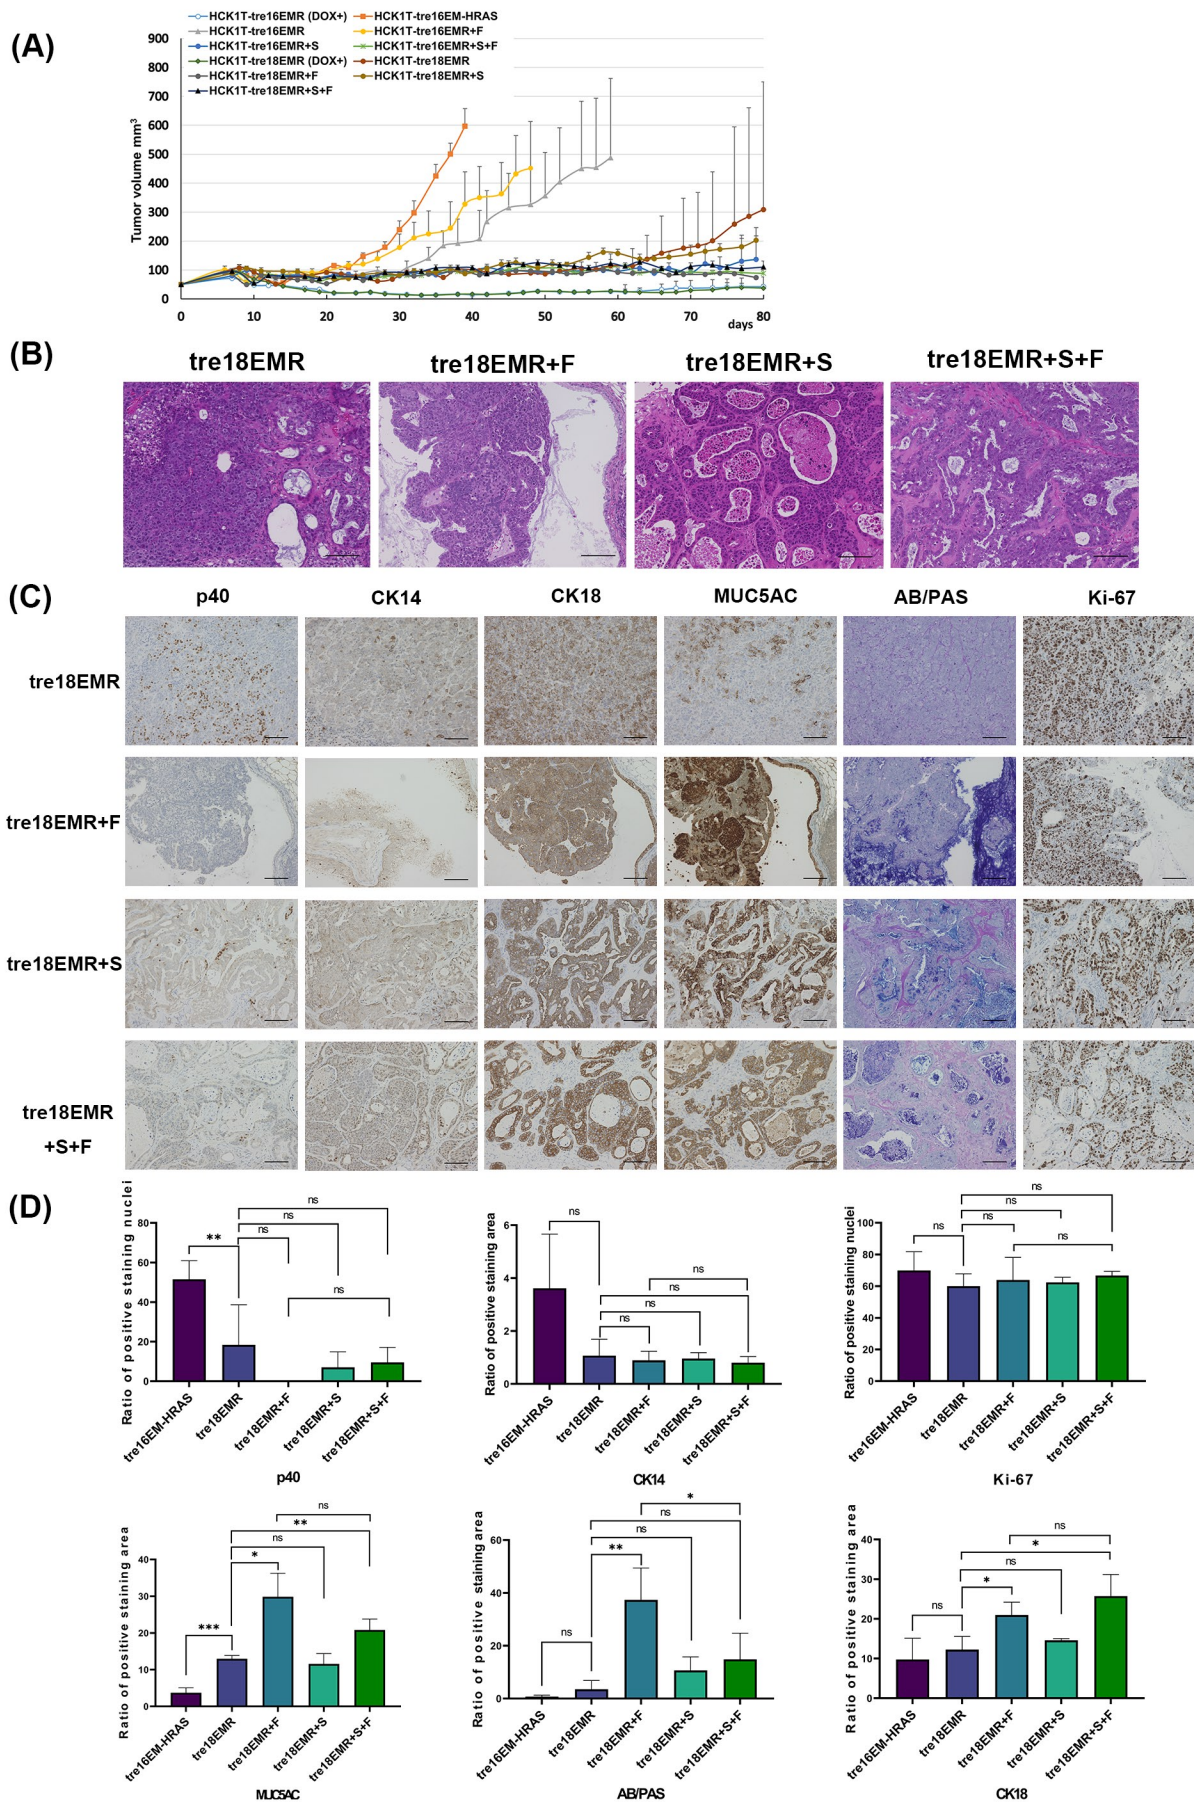

### Supplemental Figure.1 Tumor growth and histopathology in mouse xenografts

(A) Growth curves of the tumors derived from HCK1T-tre16EMR or HCK1T-tre18EMR, with or without expression of FOXA2 (+F) and/or SMAD4mi (+S), and HCK1T-tre16EMR expressing HRASG12V (HRAS). Dox (100ng/ml) was administered to a group of mice with HCK1T-tre16EMR or HCK1T-tre18EMR through drinking water (DOX+) to verify the tumor formation depends on the transgene expression. The tumor-bearing mice were sacrificed when the average tumor volume attained 600-mm<sup>3</sup>. Mice whose tumors did not reach 600-mm<sup>3</sup> were sacrificed at 100 days. Each point is the mean of the tumor volume + standard deviation (n = 8). (B)(C) Representative images of H&E staining (A) or AB/PAS staining and IHC with indicated antibodies (B) for tumors with 18EMR. A scale bar corresponds to 100- $\mu$ m. (C) Quantification for lineage-specific marker expression detected by IHC in tumors with indicated cells (n  $\geq$  3). Mean values from at least three independent tumors were plotted. Error bars showed standard deviation. P-value was evaluated using student T-test.; \*p  $\leq$  0.05, \*\*p  $\leq$  0.01, \*\*\*p  $\leq$  0.001, ns p > 0.05.
